# Supplementary material for: Semi-automated on-demand control of individual droplets with a sample application to a drug screening assay
Source: Royal Society of Chemistry journal article supplement (doi:10.1039/c9lc00128j), 2019-01-01
Supplement: c9lc00128j1.pdf [file c9lc00128j1.pdf]

## S1—1 Software logic

The objective of the following sections is to present the logic implemented in the software for each semi-automatic manipulation. First of all, some terms and intermediate steps will be defined. Then, the semi-automatic procedure for generating, merging and splitting droplet will be outlined in flow charts.

### S1—1.1 Definitions

**Channel** The channel network is divided in arbitrary channels that are numbered and controlled independently, the positive direction is always towards the nearest junction.

**Interface** Identifies the droplet limit at the interface between oil and water.

**Junction** Defines the point at the intersection of three channels that is used for measurement.

**Current position** Defines the position  $y_{current}$  where the interface is located within the channel with respect to the junction.

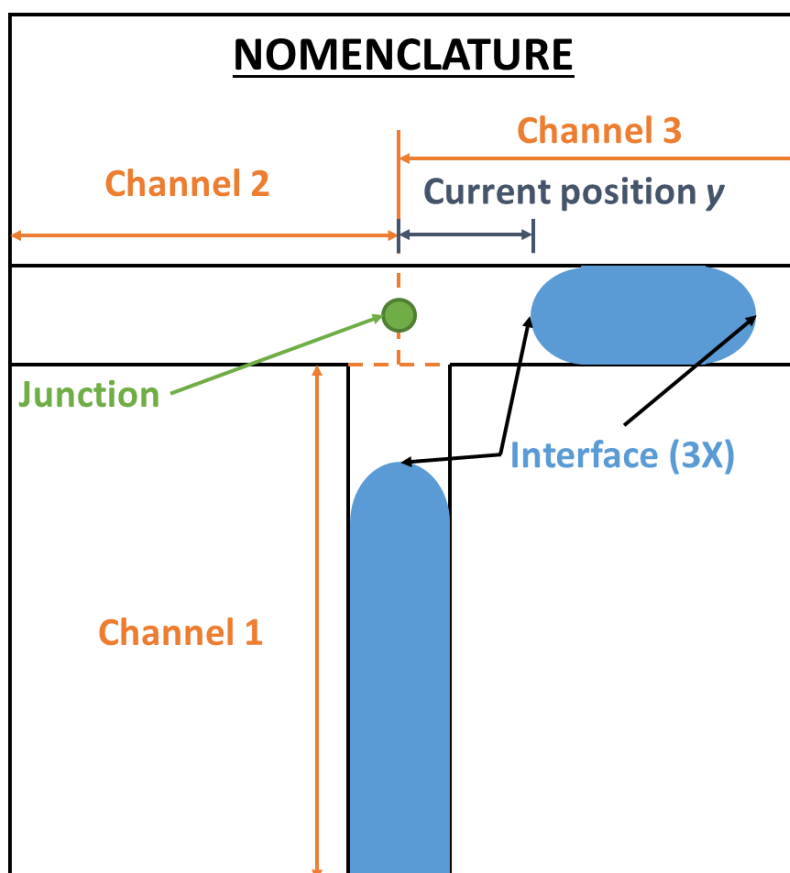

Figure S1—1.1: Definitions of elements to understand active droplet control.

### S1—1.1.1 Legend

---

**User input** Includes any action that requires human intervention from the user through the graphical user interface (GUI).

**Condition** Defines a state for which specific condition(s) must be met (for instance, the position with respect to the tolerance) in order to progress to the next step.

**Semi-automatic control** Specifies a step implemented in the software with its general description.

**Data** Shows the flow of information (depending on the arrow direction), usually represents variables stored in memory that can also be displayed to the user.

### S1—1.1.2 General

---

**Parameter definition** The user must define key parameter values (if different from default values) using the graphical user interface (GUI).

**Tolerance ( $\epsilon$ )** Defines how close to the objective the current position must be before moving to the next step, limited by the resolution of microns per pixel.

**Gains ( $K$ )** Influences the dynamic response of how “fast” the interface reaches the objective position, e.g.  $K_{gain}$  in Equation 4.

**Start the sequence** Debut of the takeover of the semi-automatic algorithm over manual control initiated by the user.

**Initial data storage** Calculated and measured quantities based on the initial stage of the system when the sequence is initiated.

**Link channels** Synchronizes two channels such that they move in unison.

**Reverse link channels** Links the displacement in two channels such that they move in opposite directions.

**Split and move away** From reverse link of the two appropriate channels, moving in opposite direction leads to the formation of two new interface; the motion away from the junction is implemented to prevent the accidental merging back of the two new interfaces.

**Wait to stabilize** A delay is implemented such that the droplet(s) can stabilize at their respective location.

**Stabilized result droplet(s)** No change in the desired droplet position, immobilization of the droplet(s) of interest for accurate measurement.

### S1—1.1.3 Specific to droplet generation ---

**Desired droplet length** [ $\mu\text{m}$ ] User-specified droplet length to be generated.

**Distance to junction** Scaled measurement between the interface and the junction point.

**Move towards junction** The interface is moved towards the junction such that the dispersed phase overflows in the adjacent channels to the junction.

**Interface selection in new channel** The user must select (using the mouse) the interface in either of the adjacent channels for which the length will be adjusted.

**Adjust droplet length** The distance between the interface and the junction is matched to the desired droplet length within the specified tolerance.

**Droplet length** Output of the length of the droplet generated as per the micron per pixel scaling.

### S1—1.1.4 Specific to droplet merging ---

**Droplet closest to junction** The interface of one of the two droplet that is measured closest to the point defining the junction.

**Droplet furthest from junction** As opposed to the droplet closest to junction, the interface that is furthest from the junction as per the initial measurements.

**Droplets equidistant from junction** The interface of both droplets at an equal distance from the junction in their respective channel.

**No more initial droplet interface** The two initial interface have merged and as such do not exist anymore.

### S1—1.1.5 Specific to droplet splitting ---

**Desired droplet ratio** [%] User-specified droplet ratio to be obtained from the two resulting droplets.

**Initial ratio** Calculated from the initial state of the system.

**Distance to move** Calculated based on the desired ratio and current state of the system.

**Adjust droplet ratio** The distance between one of the interface and the objective position is matched within the specified tolerance.

**Droplet ratio [%]** Ratio based on the measurements of the two droplets obtained at the end of the procedure.

## S1—1.2 Droplet generation

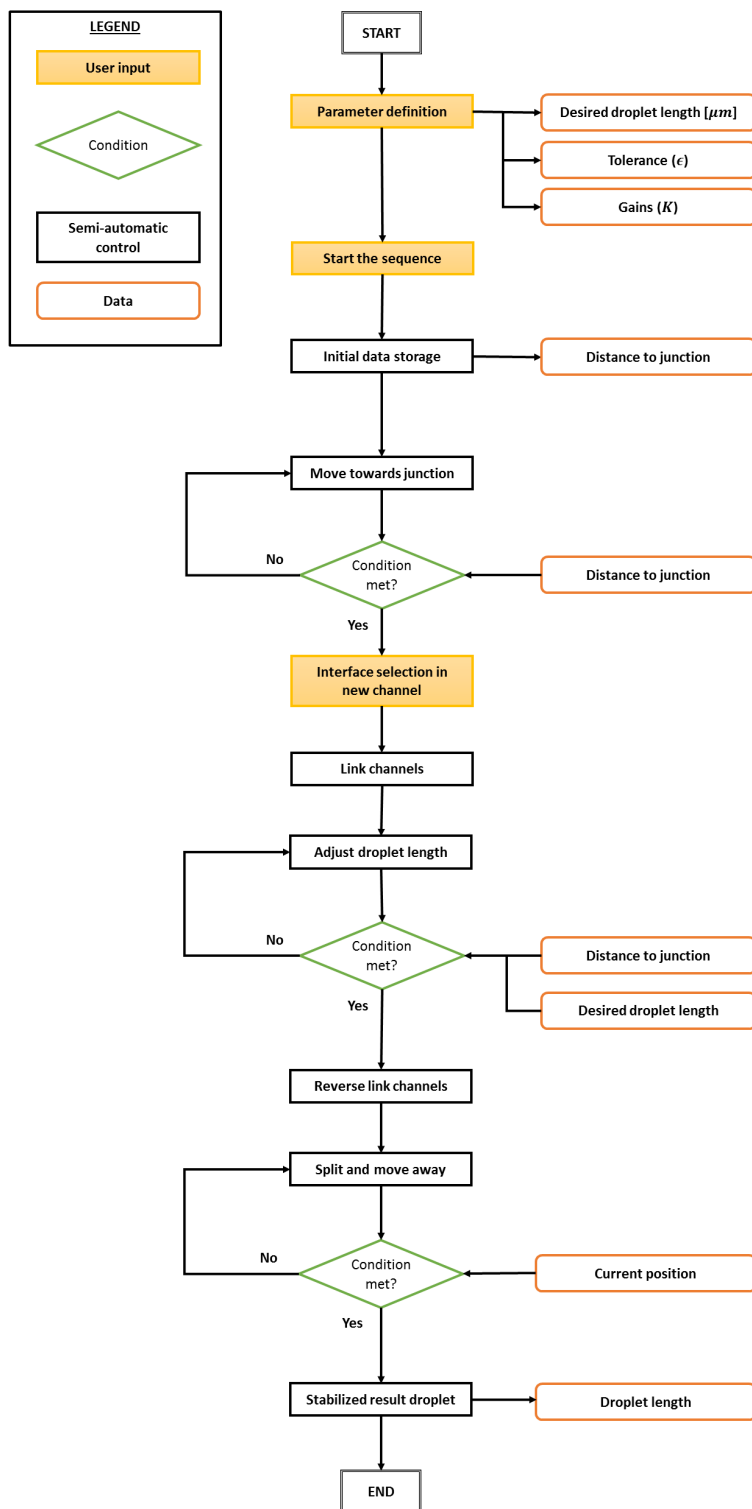

Figure S1—1.2: Flow chart for generation of a droplet of a specified length.

## S1—1.3 Droplet merging

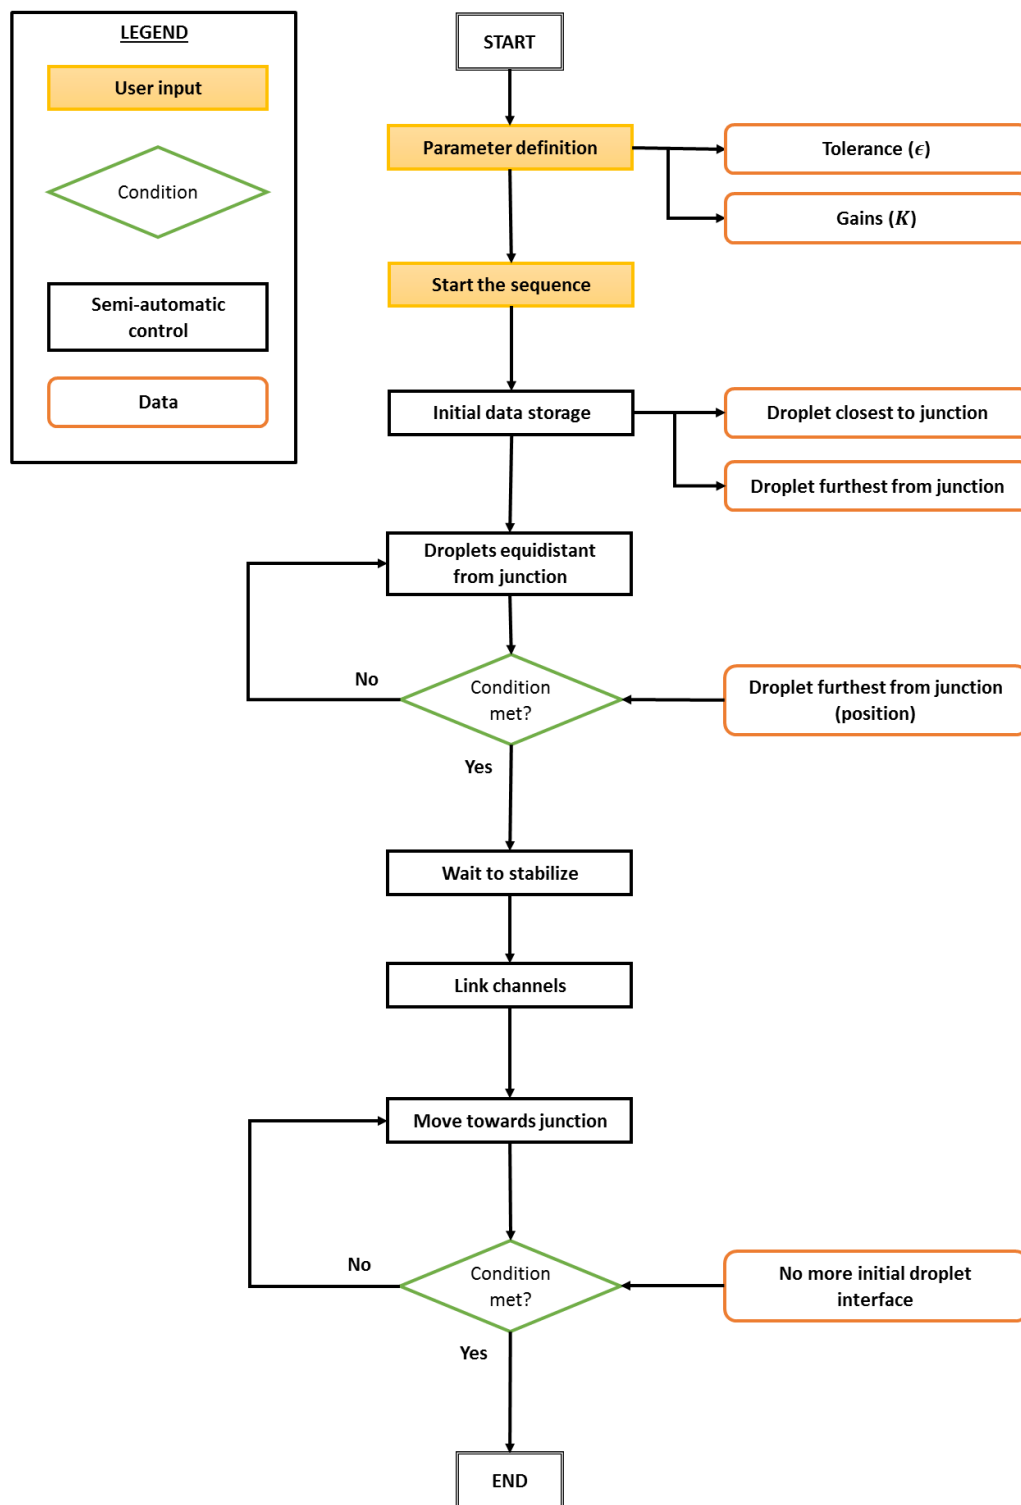

Figure S1—1.3: Flow chart for merging of two droplets.

## S1—1.4 Droplet splitting

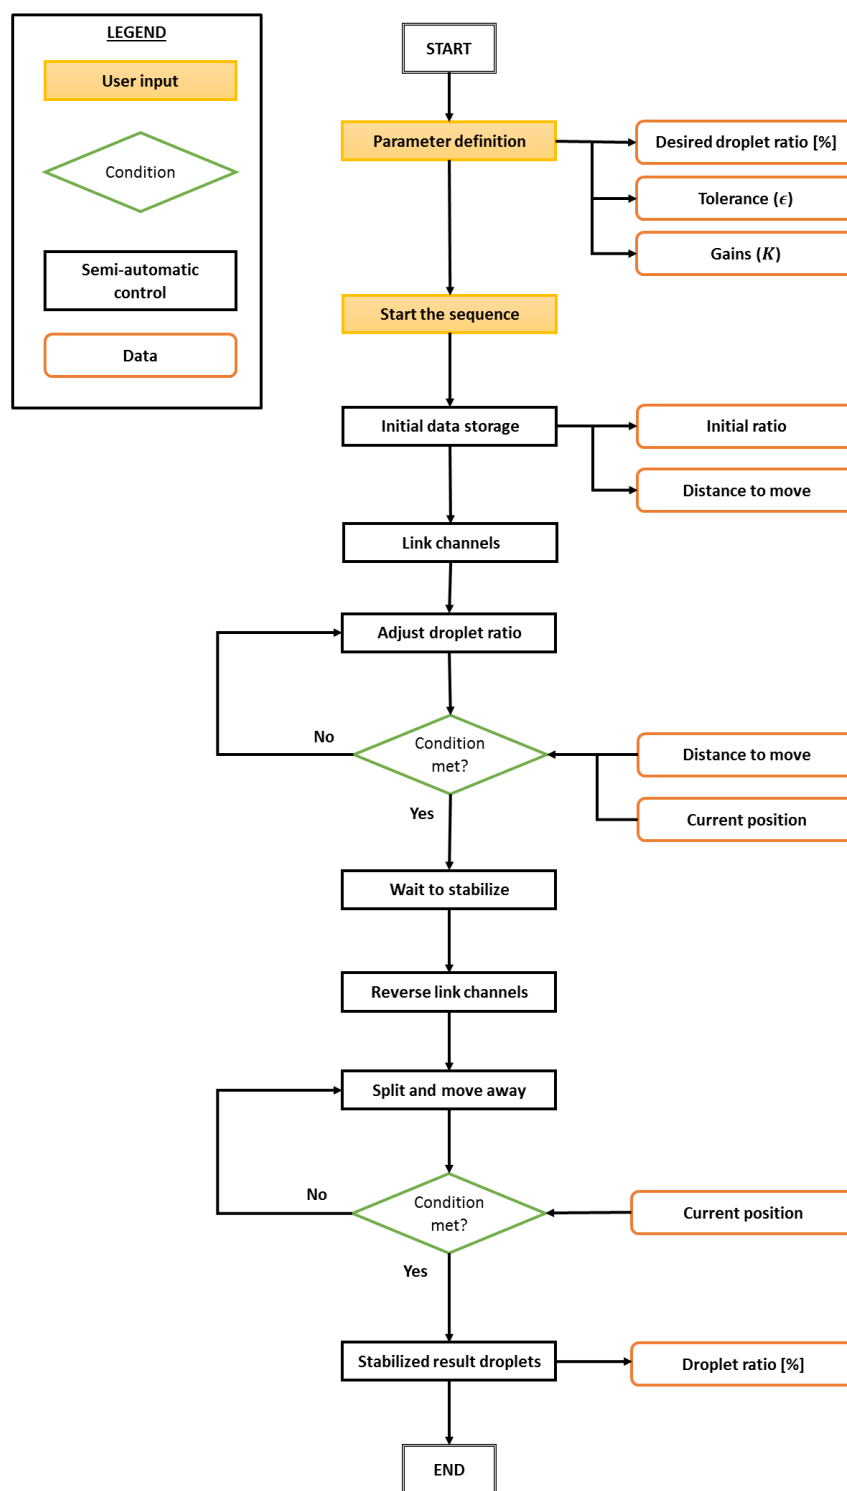

Figure S1—1.4: Flow chart for splitting of a droplet at a specified ratio.
